# Supplementary material for: Turnover intention and related factors among resident physicians in China under the standardised residency training programme: a cross-sectional survey
Source: HighWire-hosted journal article supplement (doi:10.1136/bmjopen-2022-061922), 2022-04-01
Supplement: bmjopen-2022-061922supp001_data_supplement.pdf [file bmjopen-2022-061922supp001_data_supplement.pdf]

## Appendix

### Appendix 1 The number of sampled residents by the institution of standardized residency training programs (n=1,414).

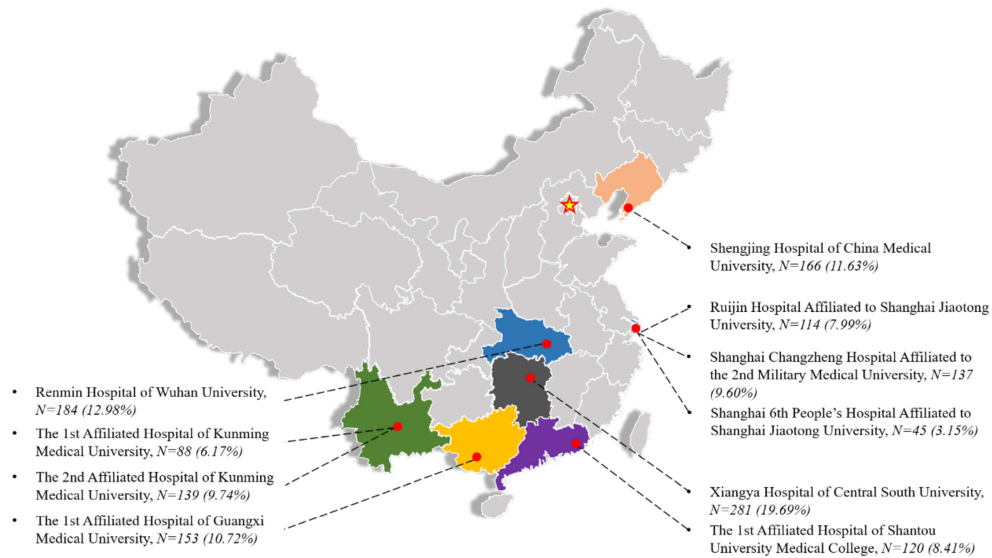

**Appendix 2. VIF tests after multiple linear regressions in Table 3**

| <b>Variable</b>                                             | <b>VIF<br/>(Model 1)</b> | <b>VIF<br/>(Model 2)</b> |
|-------------------------------------------------------------|--------------------------|--------------------------|
| <b>Age Group</b>                                            |                          |                          |
| 24-28                                                       |                          | 1.65                     |
| >28                                                         |                          | 2.05                     |
| <b>Gender (Female)</b>                                      |                          | 1.22                     |
| <b>Marital Status (Married)</b>                             |                          | 1.24                     |
| <b>Annual Income Level</b>                                  |                          |                          |
| 50-100,000 RMB                                              | 1.14                     | 1.36                     |
| >100,000 RMB                                                | 1.11                     | 1.25                     |
| <b>Education</b>                                            |                          |                          |
| Master                                                      |                          | 1.22                     |
| Doctor                                                      |                          | 1.44                     |
| <b>Year of training</b>                                     |                          |                          |
| 2                                                           | 3.00                     | 3.05                     |
| 3                                                           | 3.03                     | 3.31                     |
| <b>Specialty</b>                                            |                          |                          |
| Surgery                                                     | 1.43                     | 1.59                     |
| Gynecology & Obstetrics, General<br>Medicine and Pediatrics | 1.38                     | 1.40                     |
| Neurology, Psychiatry, Emergency,<br>and Anesthesiology     | 1.32                     | 1.33                     |
| Others                                                      | 1.36                     | 1.37                     |
| <b>Nightshift interval (≥7 days)</b>                        | 1.04                     | 1.05                     |
| <b>Working hours</b>                                        |                          |                          |
| 45~54 hours/week                                            | 1.26                     | 1.27                     |
| >54 hours/week                                              | 1.28                     | 1.28                     |
| <b>Career in Medicine</b>                                   | 1.15                     | 1.15                     |
| <b>Necessity of Training</b>                                |                          |                          |
| Neutral                                                     | 2.02                     | 2.06                     |
| Necessary                                                   | 2.20                     | 2.24                     |
| <b>Satisfaction with Income</b>                             |                          |                          |
| Neutral                                                     | 1.24                     | 1.25                     |
| Satisfied                                                   | 1.23                     | 1.24                     |
| <b>Job Satisfaction</b>                                     | 2.67                     | 2.70                     |
| <b>Resilience</b>                                           | 2.42                     | 2.44                     |
| <b>Burnout</b>                                              | 1.39                     | 1.41                     |
| <b>Mean VIF</b>                                             | <b>1.71</b>              | <b>1.66</b>              |

Note: VIF, variance inflation factor.

## Appendix 3. Modeling High Turnover intention using logistic regressions (n=1,414)

| High Turnover Intention                                     | Univariate Logistic Regression<br>Odds Ratio (SE) | Multiple Logistic Regression (Model 3)<br>Odds Ratio (SE) | Multiple Logistic Regression (Model 4)<br>Odds Ratio (SE) |
|-------------------------------------------------------------|---------------------------------------------------|-----------------------------------------------------------|-----------------------------------------------------------|
| <b>Age Group</b>                                            |                                                   |                                                           |                                                           |
| <24                                                         | Ref                                               | Ref                                                       | Ref                                                       |
| 24-28                                                       | 1.218 (0.166)                                     | 1.163 (0.197)                                             | 1.173 (0.201)                                             |
| >28                                                         | 1.514 (0.290)**                                   | 1.621 (0.407)                                             | 1.521 (0.401)                                             |
| <b>Gender</b>                                               |                                                   |                                                           |                                                           |
| Male                                                        | Ref                                               |                                                           | Ref                                                       |
| Female                                                      | 1.052 (0.114)                                     |                                                           | 1.185 (0.164)                                             |
| <b>Marital Status</b>                                       |                                                   |                                                           |                                                           |
| Single/Divorced                                             | Ref                                               |                                                           | Ref                                                       |
| Married                                                     | 1.316 (0.194)                                     |                                                           | 1.262 (0.239)                                             |
| <b>Education</b>                                            |                                                   |                                                           |                                                           |
| Bachelor                                                    | Ref                                               | Ref                                                       | Ref                                                       |
| Master                                                      | 0.998 (0.12)                                      | 0.998 (0.146)                                             | 0.935 (0.142)                                             |
| Doctor                                                      | 1.696 (0.42)*                                     | 1.578 (0.5)                                               | 1.41 (0.469)                                              |
| <b>Annual Income Level</b>                                  |                                                   |                                                           |                                                           |
| <50,000 RMB                                                 | Ref                                               |                                                           | Ref                                                       |
| 50-100,000 RMB                                              | 0.796 (0.102)                                     |                                                           | 1.105 (0.187)                                             |
| >100,000 RMB                                                | 1.67 (0.681)                                      |                                                           | 1.553 (0.844)                                             |
| <b>Year of training</b>                                     |                                                   |                                                           |                                                           |
| 1                                                           | Ref                                               | Ref                                                       | Ref                                                       |
| 2                                                           | 0.925 (0.172)                                     | 0.839 (0.175)                                             | 0.869 (0.184)                                             |
| 3                                                           | 0.616 (0.113)**                                   | 0.511 (0.109)**                                           | 0.538 (0.117)**                                           |
| <b>Specialty</b>                                            |                                                   |                                                           |                                                           |
| Internal Medicine                                           | Ref                                               | Ref                                                       | Ref                                                       |
| Surgery                                                     | 0.695 (0.107)*                                    | 0.557 (0.102)**                                           | 0.595 (0.116)**                                           |
| Gynecology & Obstetrics,<br>General Medicine and Pediatrics | 0.555 (0.091)***                                  | 0.589 (0.112)**                                           | 0.579 (0.111)**                                           |
| Neurology, Psychiatry,<br>Emergency, and Anesthesiology     | 0.869 (0.149)                                     | 0.702 (0.142)                                             | 0.712 (0.145)                                             |
| Others                                                      | 0.655 (0.104)**                                   | 0.54 (0.099)**                                            | 0.54 (0.099)**                                            |
| <b>Nightshift interval</b>                                  |                                                   |                                                           |                                                           |
| <7 days                                                     | Ref                                               |                                                           | Ref                                                       |
| ≥7 days                                                     | 0.854 (0.092)                                     |                                                           | 0.913 (0.115)                                             |
| <b>Working hours</b>                                        |                                                   |                                                           |                                                           |
| <45 hours/week                                              | Ref                                               | Ref                                                       | Ref                                                       |
| 45~54 hours/week                                            | 1.154 (0.135)                                     | 1.06 (0.147)                                              | 1.064 (0.148)                                             |
| >54 hours/week                                              | 1.57 (0.264)**                                    | 1.153 (0.227)                                             | 1.161 (0.229)                                             |
| <b>Career in Medicine</b>                                   |                                                   |                                                           |                                                           |
| Yes                                                         | Ref                                               | Ref                                                       | Ref                                                       |
| No                                                          | 0.411 (0.047)***                                  | 0.477 (0.065)***                                          | 0.474 (0.065)***                                          |
| <b>Necessity of Training</b>                                |                                                   |                                                           |                                                           |
| Unnecessary                                                 | Ref                                               | Ref                                                       | Ref                                                       |
| Neutral                                                     | 0.89 (0.14)                                       | 1.05 (0.193)                                              | 1.043 (0.193)                                             |
| Necessary                                                   | 0.635 (0.093)**                                   | 0.835 (0.149)                                             | 0.844 (0.152)                                             |
| <b>Satisfaction with Income</b>                             |                                                   |                                                           |                                                           |
| Dissatisfied                                                | Ref                                               | Ref                                                       | Ref                                                       |
| Neutral                                                     | 0.578 (0.077)***                                  | 0.694 (0.114)*                                            | 0.67 (0.114)*                                             |
| Satisfied                                                   | 0.322 (0.096)***                                  | 0.512 (0.177)                                             | 0.453 (0.165)*                                            |
| <b>Psychological Resilience</b>                             | 1.017 (0.003)***                                  | 1.058 (0.006)***                                          | 1.058 (0.006)***                                          |
| <b>Job Satisfaction</b>                                     | 1.003 (0.003)                                     | 0.996 (0.006)                                             | 0.995 (0.007)                                             |
| <b>Burnout</b>                                              | 1.045 (0.004)***                                  | 1.063 (0.006)***                                          | 1.063 (0.006)***                                          |
| <b>Pseudo r-squared</b>                                     |                                                   | 0.193                                                     | 0.196                                                     |
| <b>Chi-square</b>                                           |                                                   | 378.532***                                                | 383.036***                                                |

Turnover Intention Score was transformed into binary variable: High turnover intention=1 if score >12.

\*0.01<p<0.05, \*\*0.001<p<0.01, \*\*\*p<0.001

**Appendix 4. Model fitness index for the original SEM model and the final model**

| <b>Fit statistic</b>                      | <b><math>\chi^2</math> (P)</b> | <b>df</b> | <b><math>\chi^2/df</math></b> | <b>CFI</b>  | <b>TLI</b>  | <b>RMSEA</b> | <b>SRMR</b> | <b>CD</b> | <b>Diagnosis</b> |
|-------------------------------------------|--------------------------------|-----------|-------------------------------|-------------|-------------|--------------|-------------|-----------|------------------|
| Recommended value                         | P>0.05                         | /         | <5.0                          | $\geq 0.90$ | $\geq 0.91$ | <0.05        | <0.08       | $\Delta$  |                  |
| Original SEM Model<br>(Without mediators) | 424.128<br>(<0.001)            | 9         | 47.13                         | 0.592       | 0.139       | 0.181        | 0.101       | 0.211     | Not fit          |
| Final SEM Model<br>(Figure. 2)            | 12.568<br>(0.128)              | 8         | 1.57                          | 0.998       | 0.993       | 0.02         | 0.008       | 0.705     | Fit              |

*Notes: RMSEA, Root mean squared error of approximation; CFI, Comparative fit index; TLI, Tucker-Lewis index; SRMR, Standardized root mean squared residual; CD, Coefficient of determination.*

*$\Delta$ , CD is like R-squared for the whole model, the higher value indicate higher percentage of data can be explained by the model.*
